# Supplementary material for: Age-related differences in white matter: Understanding tensor-based results using fixel-based analysis
Source: bioRxiv or medRxiv preprint supplement (doi:10.1101/751628), 2021-01-19
Supplement: Supplementary file [file media-1.pdf]

## Supplemental Material

| Tract                                   | FA      | FD      | FC      | FDC    |
|-----------------------------------------|---------|---------|---------|--------|
| Left Cingulum retrosplenial             | -       | -       | <0.0001 | 0.0001 |
| Right Cingulum retrosplenial            | -       | -       | 0.0001  | 0.0001 |
| Left Cingulum subgenual                 | -       | -       | <0.0001 | 0.0001 |
| Right Cingulum subgenual                | -       | -       | <0.0001 | 0.0001 |
| Left Cingulum parahippocampal parietal  | 0.0019  | -       | -       | -      |
| Right Cingulum parahippocampal parietal | 0.0052  | 0.0203  | -       | -      |
| Left Cingulum parahippocampal temporal  | -       | <0.0001 | -       | 0.0001 |
| Right Cingulum parahippocampal temporal | -       | <0.0001 | -       | 0.0006 |
| Left Corticospinal Inferior             | -       | <0.0001 | 0.0031  | 0.0001 |
| Right Corticospinal Inferior            | -       | <0.0001 | 0.0014  | 0.0001 |
| Left Corticospinal Superior             | -       | -       | -       | -      |
| Right Corticospinal Superior            | -       | -       | -       | -      |
| Forceps Major                           | -       | -       | -       | -      |
| Forceps Minor                           | <0.0001 | <0.0001 | -       | 0.0001 |
| Fornix                                  | <0.0001 | <0.0001 | -       | 0.0001 |
| Left IFOF                               | <0.0001 | 0.0008  | -       | -      |
| Right IFOF                              | <0.0001 | 0.0019  | -       | 0.0088 |
| Left ILF                                | 0.0076  | -       | -       | -      |
| Right ILF                               | 0.0015  | -       | -       | 0.0302 |
| Left Internal Capsule                   | 0.0002  | <0.0001 | -       | 0.0001 |
| Right Internal Capsule                  | <0.0001 | <0.0001 | -       | 0.0003 |
| Left SLF I                              | <0.0001 | -       | 0.0049  | -      |
| Right SLF I                             | <0.0001 | -       | 0.0006  | -      |
| Left SLF II                             | <0.0001 | -       | -       | -      |
| Right SLF II                            | 0.0018  | -       | -       | -      |
| Left SLF III                            | 0.0003  | -       | -       | -      |
| Right SLF III                           | <0.0001 | -       | -       | -      |
| Left Uncinate Fasciculus                | -       | <0.0001 | -       | 0.0004 |
| Right Uncinate Fasciculus               | 0.0223  | -       | -       | 0.0298 |

**Table 1** Results of tract-specific analysis using 10,000 permutations to correct for multiple comparisons. This table shows corresponding significant p-values for younger greater than older adults for FA, FD, FC and FDC. Dashes represent no significant difference.

| Tract                                   | FA     | FD     | FC     | FDC |
|-----------------------------------------|--------|--------|--------|-----|
| Left Cingulum retrosplenial             | -      | -      | -      | -   |
| Right Cingulum retrosplenial            | 0.0107 | -      | -      | -   |
| Left Cingulum subgenual                 | -      | -      | -      | -   |
| Right Cingulum subgenual                | 0.0023 | -      | -      | -   |
| Left Cingulum parahippocampal parietal  | -      | -      | -      | -   |
| Right Cingulum parahippocampal parietal | -      | -      | -      | -   |
| Left Cingulum parahippocampal temporal  | -      | -      | -      | -   |
| Right Cingulum parahippocampal parietal | -      | -      | -      | -   |
| Left Corticospinal Inferior             | -      | -      | -      | -   |
| Right Corticospinal Inferior            | -      | -      | -      | -   |
| Left Corticospinal Superior             | -      | -      | -      | -   |
| Right Corticospinal Superior            | -      | -      | -      | -   |
| Forceps Major                           | -      | -      | 0.0463 | -   |
| Forceps Minor                           | -      | -      | -      | -   |
| Fornix                                  | -      | -      | 0.0001 | -   |
| Left IFOF                               | -      | -      | -      | -   |
| Right IFOF                              | -      | -      | -      | -   |
| Left ILF                                | -      | -      | -      | -   |
| Right ILF                               | -      | -      | -      | -   |
| Left Internal Capsule                   | -      | -      | -      | -   |
| Right Internal Capsule                  | -      | -      | -      | -   |
| Left SLF I                              | -      | 0.0111 | -      | -   |
| Right SLF I                             | -      | -      | -      | -   |
| Left SLF II                             | -      | -      | -      | -   |
| Right SLF II                            | -      | -      | -      | -   |
| Left SLF III                            | -      | -      | -      | -   |
| Right SLF III                           | -      | -      | -      | -   |
| Left Uncinate Fasciculus                | -      | -      | -      | -   |
| Right Uncinate Fasciculus               | -      | -      | -      | -   |

**Table 2** Results of tract-specific analysis using 10,000 permutations to correct for multiple comparisons. This table shows corresponding significant p-values for older greater than younger adults for FA, FD, FC and FDC. Dashes represent no significant difference.
